# Supplementary material
Source: PubMed Central journal article supplement (PMC5266544)
Supplement: NIHMS791554-supplement-1.pdf [file NIHMS791554-supplement-1.pdf]

## Supplemental Figures

### Bossaller et al, TLR9 Deficiency Leads to Accelerated Renal Disease and Myeloid Lineage Abnormalities in Pristane-Induced Murine Lupus

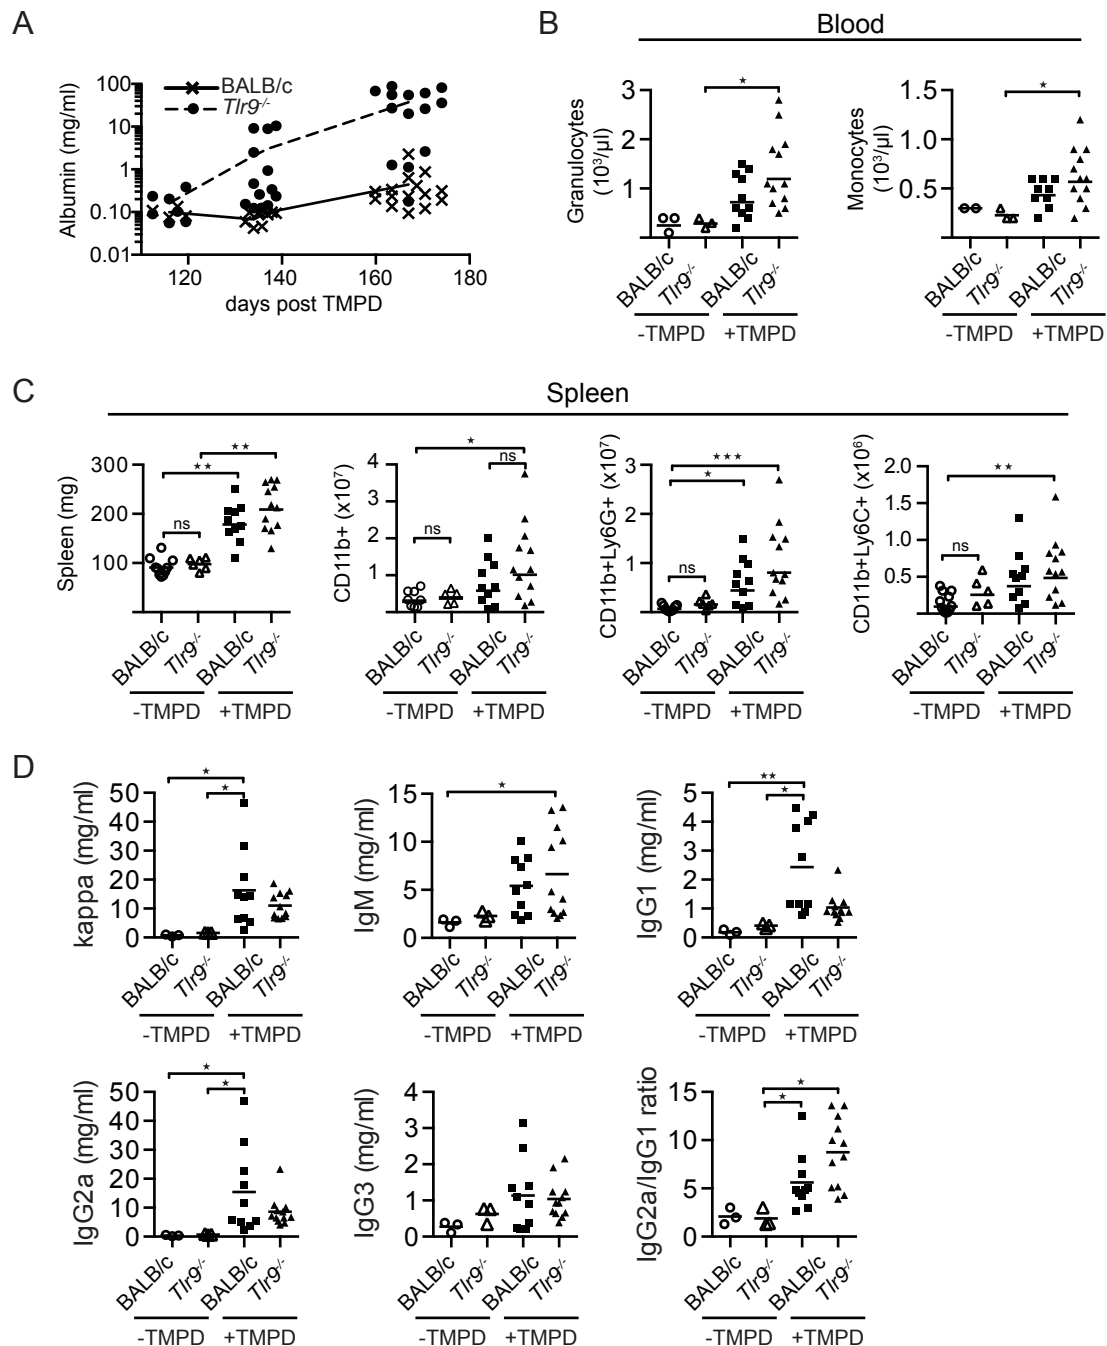

#### Supplemental Figure 1: TLR9 deficiency on the BALB/c background is not associated with systemic manifestations of autoimmunity.

(A) Albumin levels in urine collected at indicated times post TMPD injection from TMPD-treated WT BALB/c or *Tlr9*<sup>-/-</sup> mice was determined by ELISA (mg/ml). (B) Peripheral blood from TMPD-treated or aged untreated *Tlr9*<sup>-/-</sup> or WT BALB/c mice was collected on day 155 and the number of monocytes and granulocytes were quantified on Hesa - HemaTrue™ Veterinary Hematology Analyzer. (C) Spleen weights of TMPD-treated or untreated *Tlr9*<sup>-/-</sup> or WT BALB/c mice were determined on 155 day post TMPD injection and the number of CD11b<sup>+</sup> myeloid cells, CD11b<sup>+</sup>Ly6G<sup>+</sup> granulocytes and CD11b<sup>+</sup>Ly6C<sup>+</sup> monocytes determined by FACS. (D) Serum concentrations of the indicated immunoglobulin isotypes were measured by Elisa 155 days post TMPD injection. Statistics were done using the non-parametric Kruskal-Wallis test.

## Supplemental Figures

### Bossaller et al, TLR9 Deficiency Leads to Accelerated Renal Disease and Myeloid Lineage Abnormalities in Pristane-Induced Murine Lupus

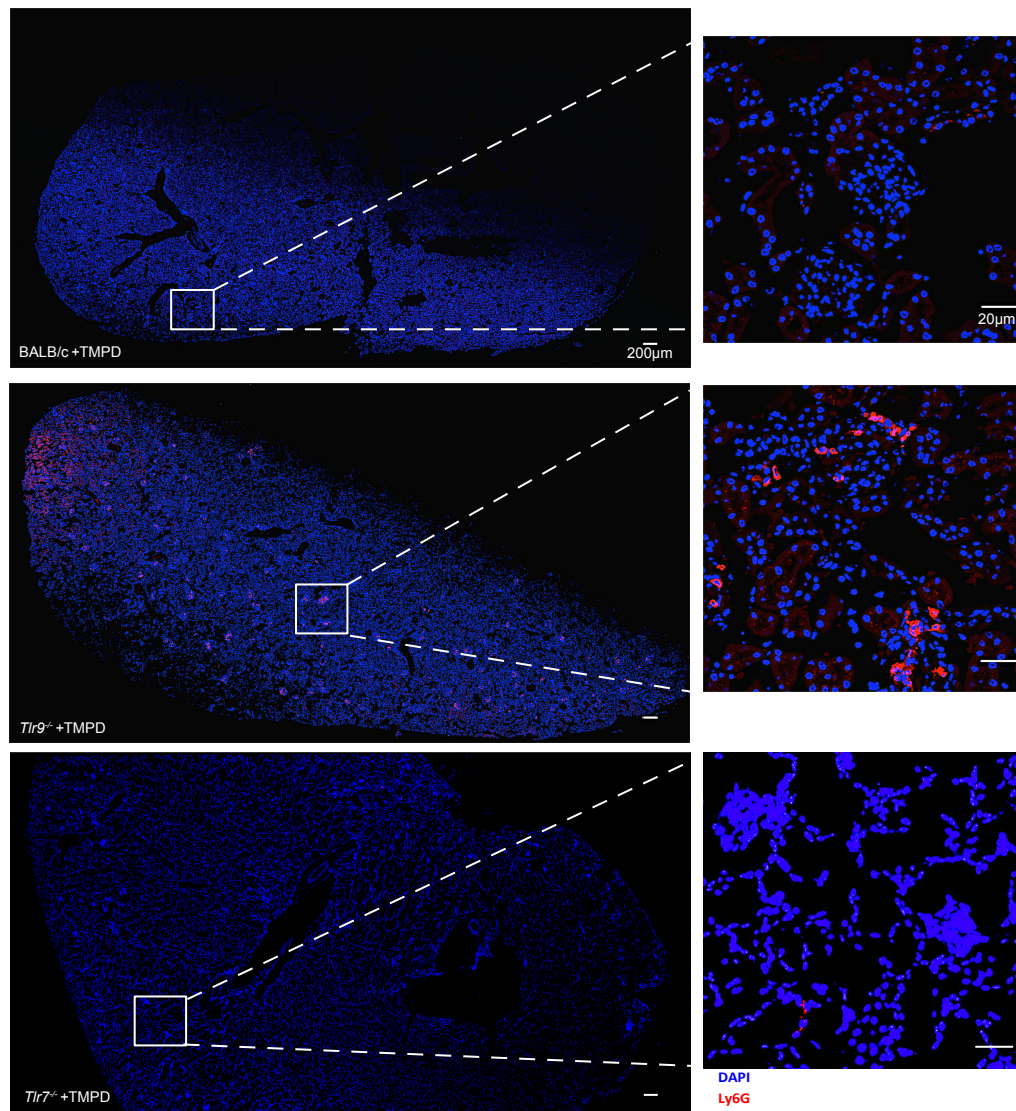

**Supplemental Figure 2: Confocal images demonstrating substantial glomerular accumulation of granulocytes 5 month post TMPD-injection in kidneys of *Tlr9*<sup>-/-</sup> but not WT or *Tlr7*<sup>-/-</sup> mice.**

Confocal images of entire kidney sections stained with DAPI (blue) and Ly6G to reveal granulocytes. The insets show higher magnification images of representative regions and demonstrate granulocyte accumulation in the *Tlr9*<sup>-/-</sup> mice.
